# Supplementary material
Source: PubMed Central journal article supplement (PMC6355597)
Supplement: eb5b64e71a17f344bcfb53f5a9121308_AAC.01846-18-s0001.pdf [file eb5b64e71a17f344bcfb53f5a9121308_AAC.01846-18-s0001.pdf]

**A protein complex from human milk enhances the activity of antibiotics  
and drugs against *Mycobacterium tuberculosis***

**Virginia Meikle<sup>1</sup>, Ann-Kristin Mossberg<sup>2</sup>, Avishek Mitra<sup>1</sup>, Anders P. Hakansson<sup>2</sup> and  
Michael Niederweis<sup>1\*</sup>**

<sup>1</sup> Department of Microbiology, University of Alabama at Birmingham, Birmingham, Alabama,  
United States of America

<sup>2</sup> Department of Translational Medicine, Division of Experimental Infection Medicine, Lund  
University, Malmo, Sweden

**\*Corresponding author:**

845 19<sup>th</sup> Street South, BBRB 609, Department of Microbiology, University of Alabama at Birmingham,  
Birmingham, AL 35294, U.S.A

Phone: +1-205-975-4390

Corresponding author email address: [mnieder@uab.edu](mailto:mnieder@uab.edu)

## SUPPLEMENT

### Supplementary Tables

| Name           | Sequence (5' to 3')                                              |
|----------------|------------------------------------------------------------------|
| NdeI-his-mutLA | TATTAACATATGCACCACCACCACCACCACCACCACAAACAGTTCACAAAATC<br>TGAATTG |
| HindIII-LA rev | CTAGATAAGCTTTACAGTTTCTCGCTA                                      |

**Table S1: Oligonucleotides used in this work.**

| Strain                                      | Parent strain and relevant genotype                                                                                                                                                                       | Reference  |
|---------------------------------------------|-----------------------------------------------------------------------------------------------------------------------------------------------------------------------------------------------------------|------------|
| <i>E. coli</i> DH5 $\alpha$                 | recA1; endA1; gyrA96; thi; relA1; hsdR17(rK-;mK+); supE44; $\Phi$ 80 $\Delta$ lacZ $\Delta$ M15 $\Delta$ lacZYA-argF; UE169                                                                               | (1)        |
| <i>E. coli</i> BL21(DE3)                    | <i>E. coli</i> B derivative; F <sup>-</sup> <i>ompT gal dcm lon hsdS<sub>B</sub>(r<sub>B</sub><sup>-</sup> m<sub>B</sub><sup>-</sup>)</i> $\lambda$ (DE3 [ <i>lacI lacUV5-T7 gene 1 ind1 sam7 nin5</i> ]) | (2)        |
| <i>M. tuberculosis</i> H37Rv                | wild-type                                                                                                                                                                                                 | ATCC 25618 |
| <i>M. tuberculosis</i> mc <sup>2</sup> 6206 | H37Rv derivative, $\Delta$ <i>leuCD</i> , $\Delta$ <i>panCD</i>                                                                                                                                           | (3)        |
| <i>S. pneumoniae</i> R36A                   | Non-encapsulated derivative of the wild-type strain D39; obtained from Dr. D. E. Briles                                                                                                                   | (4)        |

**Table S2. Strains used in this work.**

| Plasmid    | Components and properties                                                                                   | Reference    |
|------------|-------------------------------------------------------------------------------------------------------------|--------------|
| pET-21(b)+ | f1 origin of replication, amp <sup>R</sup> , T7lac                                                          | Novagen      |
| pML3438    | pET-21(b)+ - derivative; $\alpha$ -lactalbumin expression plasmid; ColE1 origin; amp <sup>R</sup> ; 5780 bp | (this study) |

**Table S3. Plasmids used in this work.**

The annotation amp<sup>R</sup> indicates that the plasmid confers resistance to ampicillin. "Origin" denotes the origin of replication.

## Supplementary Figures

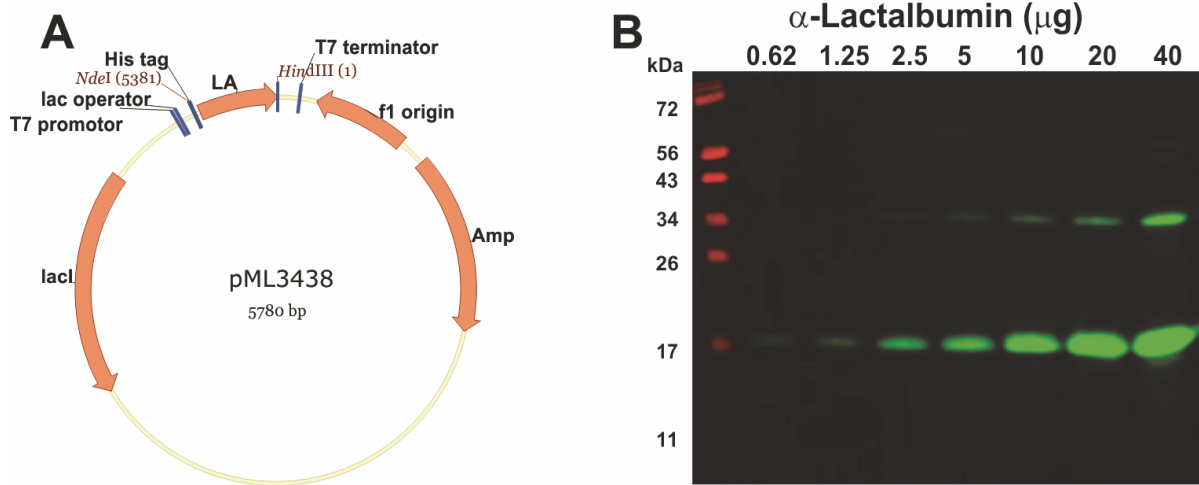

**Fig. S1. Expression vector and production of recombinant  $\alpha$ -lactalbumin from *E. coli*.**

**A.** Map of the  $\alpha$ -lactalbumin expression plasmid pML3438. The recombinant  $\alpha$ -lactalbumin gene (*hALA*) encodes a mutated human  $\alpha$ -lactalbumin (C6S, C28S, C61S, C73S, C77S, D87A, C91S, C111S, C120S) with an N-terminal histidine tag comprising eight histidines. Transcription of the *hALA* gene is initiated from the bacteriophage T7 promoter. The *bla* gene confers resistance to ampicillin. **B.** The recombinant  $\alpha$ -lactalbumin protein was purified by Ni(II) affinity chromatography. Different amounts of  $\alpha$ -lactalbumin (LA) were loaded on a protein gel and detected by a monoclonal antibody in a western blot. The theoretical molecular mass of the recombinant  $\alpha$ -lactalbumin is 15 kDa. The band with an apparent molecular mass of app. 34 kDa is probably dimeric  $\alpha$ -lactalbumin.

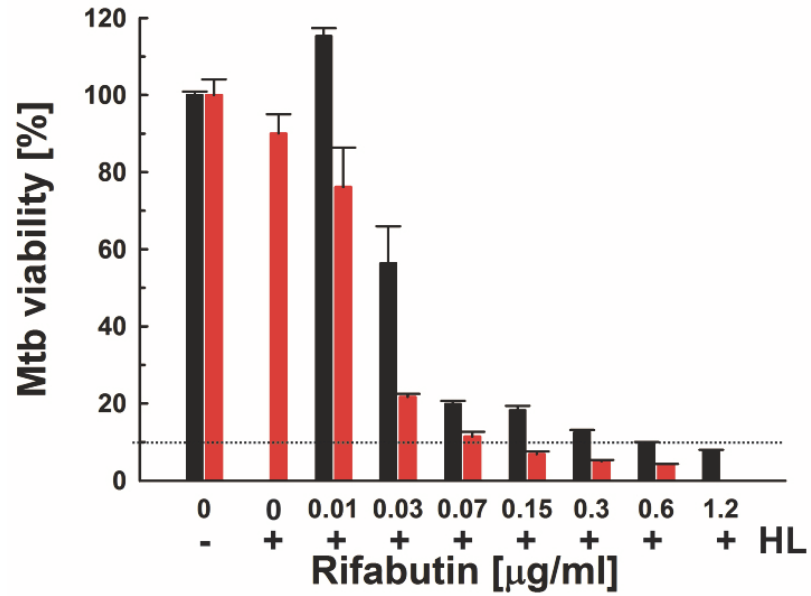

**Fig. S2. HAMLET potentiates the efficacy of rifabutin against *M. tuberculosis***

*M. tuberculosis* H37Rv was incubated with increasing concentrations of rifabutin in the absence (black bars) or presence (red bars) of 90 µg/ml HAMLET (75% of the MIC<sub>90</sub>). The viability of *M. tuberculosis* H37Rv was determined by the microplate Alamar Blue assay. Error bars represent standard errors of the mean values of biological triplicates.

## Supplementary References

1. **Hanahan, D.** 1983. Studies on transformation of *Escherichia coli* with plasmids. J Mol Biol **166**:557-580.
2. **Studier, F. W., and B. A. Moffatt.** 1986. Use of bacteriophage T7 RNA polymerase to direct selective high-level expression of cloned genes. J. Mol. Biol. **189**:113-130.
3. **Sampson, S. L., C. C. Dascher, V. K. Sambandamurthy, R. G. Russell, W. R. Jacobs, Jr., B. R. Bloom, and M. K. Hondalus.** 2004. Protection elicited by a double leucine and pantothenate auxotroph of *Mycobacterium tuberculosis* in guinea pigs. Infect Immun **72**:3031-3037.
4. **Avery, O. T., C. M. Macleod, and M. McCarty.** 1944. Studies on the chemical nature of the substance inducing transformation of pneumococcal types: induction of transformation by a desoxyribonucleic acid fraction isolated from pneumococcus type iii. J Exp Med **79**:137-158.
